# Supplementary material for: p-Aminobenzoic acid polymorphs under high pressures
Source: Royal Society of Chemistry journal article supplement (doi:10.1039/c4ra00247d), 2014-01-01
Supplement: c4ra00247d1.pdf [file c4ra00247d1.pdf]

# Supporting Information

## *p*-Aminobenzoic Acid Polymorphs Under High Pressures

Tingting Yan<sup>a</sup>, Kai Wang<sup>a,\*</sup>, Defang Duan<sup>a</sup>, Xiao Tan<sup>a</sup>, Bingbing Liu<sup>a</sup>, and Bo Zou<sup>a,\*</sup>

<sup>†</sup>State Key Laboratory of Superhard Materials, Jilin University, Changchun 130012, China

\*Corresponding author. E-mail: [zoubo@jlu.edu.cn](mailto:zoubo@jlu.edu.cn)

**Table S1** *Ab initio* calculated unit-cell parameters and atomic coordinates of  $\alpha$ -PABA and  $\beta$ -PABA at 0 GPa, 7 GPa, and 13 GPa, respectively.

| $\alpha$ -PABA | $a$     | $b$    | $c$     | $V$     | $\beta$ |
|----------------|---------|--------|---------|---------|---------|
| 0 GPa          | 18.5351 | 5.4722 | 18.2145 | 1652.24 | 94.220  |
| 7 GPa          | 17.4913 | 3.4486 | 17.1378 | 965.40  | 95.829  |
| 13 GPa         | 17.0859 | 2.9521 | 16.5768 | 796.04  | 94.871  |

| $\alpha$ -PABA at 0 GPa |          |          |          | $\alpha$ -PABA at 7 GPa |          |          | $\alpha$ -PABA at 13 GPa |          |          |
|-------------------------|----------|----------|----------|-------------------------|----------|----------|--------------------------|----------|----------|
| Atom                    | X/a      | Y/b      | Z/c      | X/a                     | Y/b      | Z/c      | X/a                      | Y/b      | Z/c      |
| C1                      | 0.14916  | -0.77084 | -0.07572 | 0.15320                 | -0.70417 | -0.06805 | 0.15324                  | -0.63507 | -0.06640 |
| C2                      | 0.41937  | 0.74333  | 0.14239  | 0.43082                 | 0.66098  | 0.15020  | 0.43166                  | 0.59034  | 0.15174  |
| C3                      | 0.22251  | -0.84754 | -0.05243 | 0.22531                 | -0.80454 | -0.02875 | 0.22425                  | -0.74266 | -0.02610 |
| C4                      | 0.44469  | 0.80162  | 0.21830  | 0.46699                 | 0.73863  | 0.22414  | 0.46822                  | 0.67261  | 0.22733  |
| C5                      | 0.28440  | -0.75394 | -0.08572 | 0.28972                 | -0.73885 | -0.06136 | 0.29192                  | -0.67888 | -0.06049 |
| C6                      | 0.41197  | 0.70168  | 0.28029  | 0.43364                 | 0.64019  | 0.28949  | 0.43317                  | 0.57711  | 0.29493  |
| C7                      | 0.27545  | -0.57752 | -0.14425 | 0.28834                 | -0.56377 | -0.13504 | 0.29112                  | -0.48811 | -0.13576 |
| C8                      | 0.35194  | 0.53499  | 0.26894  | 0.36251                 | 0.44967  | 0.28301  | 0.36118                  | 0.37065  | 0.28933  |
| C9                      | 0.20156  | -0.49999 | -0.16765 | 0.21757                 | -0.45618 | -0.17370 | 0.21951                  | -0.36744 | -0.17450 |
| C10                     | 0.32622  | 0.47653  | 0.19238  | 0.32661                 | 0.37087  | 0.20848  | 0.32553                  | 0.28307  | 0.21300  |
| C11                     | 0.14020  | -0.59571 | -0.13389 | 0.15149                 | -0.52421 | -0.14068 | 0.15172                  | -0.44032 | -0.14065 |
| C12                     | 0.35945  | 0.57928  | 0.13708  | 0.36004                 | 0.47553  | 0.14343  | 0.35965                  | 0.39423  | 0.14553  |
| C13                     | 0.08336  | -0.87218 | -0.04014 | 0.08342                 | -0.80921 | -0.03646 | 0.08232                  | -0.76146 | -0.03551 |
| C14                     | 0.45627  | 0.85494  | 0.07798  | 0.46387                 | 0.79428  | 0.08178  | 0.46385                  | 0.75325  | 0.08200  |
| H1                      | -0.02361 | -0.88330 | -0.04310 | -0.02292                | -0.83231 | -0.04752 | -0.02487                 | -0.83094 | -0.04885 |
| H2                      | 0.45582  | 0.90234  | -0.03024 | 0.45314                 | 0.88754  | -0.03129 | 0.45071                  | 0.91108  | -0.03268 |
| H3                      | 0.23077  | -0.98602 | -0.00777 | 0.22580                 | -0.91501 | 0.02806  | 0.22549                  | -0.89436 | 0.03206  |
| H4                      | 0.49099  | 0.93110  | 0.22773  | 0.52120                 | 0.89526  | 0.22913  | 0.52275                  | 0.84457  | 0.23183  |
| H5                      | 0.34107  | -0.81910 | -0.06747 | 0.34383                 | -0.82300 | -0.03043 | 0.34668                  | -0.77510 | -0.03000 |
| H6                      | 0.43228  | 0.75133  | 0.33907  | 0.46138                 | 0.71773  | 0.34639  | 0.46000                  | 0.67725  | 0.35244  |
| H7                      | 0.39006  | -0.52799 | -0.15720 | 0.40429                 | -0.60753 | -0.14191 | 0.40877                  | -0.54694 | -0.14482 |
| H8                      | 0.34346  | 0.46000  | 0.38554  | 0.35558                 | 0.38978  | 0.40156  | 0.35187                  | 0.32600  | 0.41107  |
| H9                      | 0.33046  | -0.34742 | -0.21684 | 0.35388                 | -0.33199 | -0.21681 | 0.35852                  | -0.24199 | -0.22045 |
| H10                     | 0.27867  | 0.30618  | 0.32235  | 0.28145                 | 0.16847  | 0.34036  | 0.27808                  | 0.07122  | 0.34905  |
| H11                     | 0.19309  | -0.36028 | -0.21206 | 0.21552                 | -0.31594 | -0.23022 | 0.21842                  | -0.21597 | -0.23207 |
| H12                     | 0.28082  | 0.34368  | 0.18208  | 0.27285                 | 0.21104  | 0.202777 | 0.27103                  | 0.11356  | 0.20797  |
| H13                     | 0.08338  | -0.53282 | -0.15232 | 0.09677                 | -0.44144 | -0.17130 | 0.09600                  | -0.35308 | -0.17161 |
| H14                     | 0.33918  | 0.53023  | 0.07196  | 0.33125                 | 0.41886  | 0.08576  | 0.33056                  | 0.33593  | 0.08645  |
| N1                      | 0.33655  | -0.48893 | -0.17908 | 0.35366                 | -0.50830 | -0.16902 | 0.35774                  | -0.43248 | -0.17177 |
| N2                      | 0.31905  | 0.43757  | 0.33506  | 0.32785                 | 0.34985  | 0.34679  | 0.32482                  | 0.26615  | 0.35514  |
| O1                      | 0.08985  | -1.00802 | 0.01219  | 0.08421                 | -1.00207 | 0.02077  | 0.08331                  | -0.96595 | 0.02349  |
| O2                      | 0.51031  | 0.97732  | 0.08957  | 0.52440                 | 0.95746  | 0.08895  | 0.52707                  | 0.91030  | 0.08946  |
| O3                      | 0.42745  | 0.81300  | 0.01271  | 0.42853                 | 0.74074  | 0.01918  | 0.42564                  | 0.73770  | 0.01872  |
| O4                      | 0.02118  | -0.80527 | -0.06887 | 0.02366                 | -0.70227 | -0.17197 | 0.02159                  | -0.66622 | -0.07298 |

| $\beta$ -PABA | $a$    | $b$     | $c$     | $V$     | $\beta$ |
|---------------|--------|---------|---------|---------|---------|
| 0 GPa         | 6.5399 | 10.1441 | 12.8568 | 831.195 | 97.1401 |
| 7 GPa         | 5.7362 | 7.9205  | 11.7896 | 663.009 | 100.653 |
| 13 GPa        | 5.5262 | 7.4112  | 10.9888 | 596.631 | 100.429 |

| $\beta$ -PABA at 0 GPa |          |         | $\beta$ -PABA at 7 GPa |          |         | $\beta$ -PABA at 13 GPa |          |          |         |
|------------------------|----------|---------|------------------------|----------|---------|-------------------------|----------|----------|---------|
| Atom                   | X/a      | Y/b     | Z/c                    | X/a      | Y/b     | Z/c                     | X/a      | Y/b      | Z/c     |
| C1                     | 0.20176  | 0.31223 | 0.52382                | 0.18611  | 0.30908 | 0.49000                 | 0.18781  | 0.31835  | 0.47967 |
| C2                     | -0.10174 | 0.06682 | 0.73443                | -0.13420 | 0.00217 | 0.71632                 | -0.12861 | -0.01350 | 0.71040 |
| C3                     | 0.09220  | 0.22791 | 0.59456                | 0.07120  | 0.20600 | 0.56808                 | 0.07265  | 0.20851  | 0.56054 |
| C4                     | -0.10687 | 0.17780 | 0.56364                | -0.15769 | 0.14657 | 0.53272                 | -0.16044 | 0.15266  | 0.52275 |
| C5                     | 0.09681  | 0.11783 | 0.76615                | 0.09198  | 0.06619 | 0.75378                 | 0.10009  | 0.04860  | 0.75106 |
| C6                     | -0.20268 | 0.09839 | 0.63258                | -0.25919 | 0.04407 | 0.60614                 | -0.26017 | 0.04124  | 0.59836 |
| C7                     | 0.19165  | 0.19678 | 0.69681                | 0.19483  | 0.16471 | 0.67881                 | 0.20131  | 0.15711  | 0.67469 |

|    |          |          |         |          |          |         |          |          |         |
|----|----------|----------|---------|----------|----------|---------|----------|----------|---------|
| H1 | 0.17631  | 0.40134  | 0.38810 | 0.13410  | 0.45939  | 0.35614 | 0.13257  | 0.49289  | 0.34727 |
| H2 | -0.09836 | -0.05949 | 0.86143 | -0.12342 | -0.14043 | 0.86392 | -0.11747 | -0.16422 | 0.86482 |
| H3 | -0.31116 | -0.07079 | 0.77105 | -0.36089 | -0.17970 | 0.75618 | -0.34812 | -0.21202 | 0.74602 |
| H4 | -0.18655 | 0.20151  | 0.48506 | -0.25434 | 0.18199  | 0.44745 | -0.26077 | 0.19817  | 0.43527 |
| H5 | 0.17518  | 0.09455  | 0.84525 | 0.18328  | 0.03969  | 0.84135 | 0.19339  | 0.01455  | 0.84206 |
| H6 | -0.35772 | 0.06086  | 0.60788 | -0.43746 | -0.00181 | 0.58119 | -0.44234 | -0.00155 | 0.57622 |
| H7 | 0.34541  | 0.23597  | 0.72144 | 0.37089  | 0.21288  | 0.70737 | 0.38028  | 0.20343  | 0.70503 |
| N1 | -0.20034 | -0.00887 | 0.80709 | -0.24070 | -0.09151 | 0.79416 | -0.23563 | -0.11759 | 0.78939 |
| O1 | 0.09237  | 0.33947  | 0.42915 | 0.04078  | 0.37129  | 0.39914 | 0.03943  | 0.39585  | 0.39162 |
| O2 | 0.37791  | 0.35412  | 0.54874 | 0.39877  | 0.33555  | 0.50634 | 0.40509  | 0.33488  | 0.49208 |
